# Supplementary material for: Gene Teams are on the Field: Evaluation of Variants in Gene-Networks Using High Dimensional Modelling
Source: Research Square preprint supplement (doi:10.21203/rs.3.rs-1343509/v2), 2023-02-16
Supplement: Supplementary file 1 [file 2ffe6d997ca6ca0e3e38ed77.xlsx]

## Sheet: Sayfa1
	Pathway	Locus	Allele	Count (%)
				Control	Patient
	mTOR	Polymorphic locus	Reference allele	2831974 (23.43)	2832199 (23.44)
			Variant allele	1887626 (34.12)	1887401 (35.18)
		Pathogenic locus	Reference allele	2691080 (35.24)	2498073 (31.03)
			Variant allele	639320 (7.21)	832327 (10.35)
	TGF-beta	Polymorphic locus	Reference allele	8248431 (23.52)	8246724 (23.93)
			Variant allele	5490769 (35.94)	5492476 (35.93)
		Pathogenic locus	Reference allele	7443241 (32.43)	6908830 (30.10)
			Variant allele	1765959 (7.71)	2300370 (10.02)
		Supplementary Table-2: Percentage of the alleles at polymorphic and pathogenic loci in artificially constructed control and patient sets of pathway (mTOR/TGF-beta) genes. Base substitution in these loci was performed randomly so that reference base in polymorphic loci was substituted by variant base in approximatetly 40% of the samples in both groups. Reference base in pathogenic loci, was substi…
