# Supplementary material for: Gene Teams are on the Field: Evaluation of Variants in Gene-Networks Using High Dimensional Modelling
Source: Research Square preprint supplement (doi:10.21203/rs.3.rs-1343509/v2), 2023-02-16
Supplement: Supplementary file 2 [file 966093df03b35311f2bc1e65.xlsx]

## Sheet: Sayfa1
		Supplemantary. Table-1: List and main properties of the pathway genes used as reference sequence in the study.	Supplemantary. Table: List and main properties of the genes used as reference sequence in the study.
		Pathway	Gene No	Gene Symbol	Gene Stable ID	Chromosomal Location (Karyotype Band)	Coordinate (GRCh37/hg19)	Strand	Transcript Count	Sequence Length (base pair)	GC Content (%)
		mTOR	1	AKT1	ENSG00000142208	14q32.33	Chr14:104769349-104795751	-1	19	26402	64.08
			2	EIF4E	ENSG00000151247	4q23	Chr4:98879276-98929133	-1	11	58953	39.01
			3	EIF4EBP1	ENSG00000187840	8p11.23	Chr8:38030534-38060365	1	2	30024	49.17
			4	FKBP1A	ENSG00000088832	20p13	Chr20:1368977-1393164	-1	19	24184	45.46
			5	FOXO3	ENSG00000118689	6q21	Chr6:108559835-108684774	1	3	124939	41.71
			6	GSK3B	ENSG00000082701	3q13.33	Chr3:119821321-120094994	-1	69	273094	37.20
			7	LAMTOR1	ENSG00000149357	11q13.4	Chr11:72085895-72103297	-1	8	17492	47.92
			8	LAMTOR2	ENSG00000116586	1q22	Chr1:156054782-156058506	1	6	3758	50.95
			9	LAMTOR3	ENSG00000109270	4q23	Chr4:99878336-99894428	-1	3	16154	34.87
			10	LAMTOR4	ENSG00000188186	7q22.1	Chr7:100148907-100155944	1	12	7037	53.24
			11	LAMTOR5	ENSG00000134248	1p13.3	Chr1:110401249-110407942	-1	7	6693	42.55
			12	MAPKAP1	ENSG00000119487	9q33.3	Chr9:125437393-125707234	-1	20	269841	41.82
			13	MLST8	ENSG00000167965	16p13.3	Chr16:2204248-2209453	1	35	5168	61.93
			14	MTOR	ENSG00000198793	1p36.22	Chr1:11106535-11262551	-1	7	155972	44.54
			15	NOS3	ENSG00000164867	7q36.1	Chr7:150991017-151014588	1	10	23593	57.59
			16	PDPK1	ENSG00000140992	16p13.3	Chr16:2537979-2603188	1	17	65224	52.50
			17	PIK3CA	ENSG00000121879	3q26.32	Chr3:179148114-179240093	1	10	91979	35.78
			18	PPP2CA	ENSG00000113575	5q31.1	Chr5:134194332-134226073	-1	6	31808	40.30
			19	RHEB	ENSG00000106615	7q36.1	Chr7:151466012-151520120	-1	7	54108	42.00
			20	RICTOR	ENSG00000164327	5p13.1	Chr5:38937920-39074399	-1	10	136489	35.53
			21	RPS6	ENSG00000137154	9p22.1	Chr9:19375715-19380236	-1	5	4539	40.65
			22	RPS6KB1	ENSG00000108443	17q23.1	Chr17:59893046-59950574	1	12	57478	41.68
			23	RPTOR	ENSG00000141564	17q25.3	Chr17:80544819-80966371	1	12	421552	49.12
			24	RRAGA	ENSG00000155876	9p22.1	Chr9:19049427-19051025	1	1	1647	51.09
			25	RRAGB	ENSG00000083750	Xp11.21	ChrX:55717749-55758774	1	6	41035	40.86
			26	RRAGC	ENSG00000116954	1p34.3	Chr1:38838198-38859772	-1	4	21625	41.36
			27	RRAGD	ENSG00000025039	6q15	Chr6:89364616-89412273	-1	3	47634	42.23
			28	SLC38A9	ENSG00000177058	5q11.2	Chr5:55625845-55773194	-1	26	147349	38.77
			29	TGFBR1	ENSG00000106799	9q22.33	Chr9:99104038-99154192	1	10	50154	39.03
			30	TSC1	ENSG00000165699	9q34.13	Chr9:132891348-132946874	-1	47	53285	43.24
			31	TSC2	ENSG00000103197	16p13.3	Chr16:2047967-2089491	1	69	41250	59.93
		TGF-beta	1	ACVR1	ENSG00000115170	2q24.1	Chr2:158592958-158732374	-1	10	139416	40.31
			2	ACVR1B	ENSG00000135503	12q13.13	Chr12:52345451-52390862	1	7	45411	44.84
			3	ACVR1C	ENSG00000123612	2q24.1	Chr2:158383279-158485517	-1	4	102238	36.88
			4	ACVR2A	ENSG00000121989	2q22.3	Chr2:148602086-148688393	1	7	86307	35.46
			5	ACVR2B	ENSG00000114739	3p22.2	Chr3:38495342-38534633	1	3	39291	47.64
			6	AMH	ENSG00000104899	19p13.3	Chr19:2249308-2252072	1	4	2764	71.68
			7	AMHR2	ENSG00000135409	12q13.13	Chr12:53817639-53825318	1	7	7679	52.75
			8	BAMBI	ENSG00000095739	10p12.1	Chr10:28966271-28971868	1	2	5597	47.11
			9	BMP2	ENSG00000125845	20p12.3	Chr20:6748311-6760927	1	1	12616	43.78
			10	BMP4	ENSG00000125378	14q22.2	Chr14:54416454-54425479	-1	9	9025	53.91
			11	BMP5	ENSG00000112175	6p12.1	Chr6:55618443-55740362	-1	2	121919	34.10
			12	BMP6	ENSG00000153162	6p24.3	Chr6:7727030-7881655	1	1	154625	43.38
			13	BMP7	ENSG00000101144	20q13.31	Chr20:55743804-55841685	-1	9	97881	49.98
			14	BMP8A	ENSG00000183682	1p34.3	Chr1:39957318-39991607	1	1	34289	55.00
			15	BMP8B	ENSG00000116985	1p34.2	Chr1:40222854-40254533	-1	2	31679	55.56
			16	BMPR1A	ENSG00000107779	10q23.2	Chr10:88516407-88692595	1	2	176188	39.89
			17	BMPR1B	ENSG00000138696	4q22.3	Chr4:95679119-96079599	1	8	400480	36.70
			18	BMPR2	ENSG00000204217	2q33.1	Chr2:203241659-203432474	1	3	190815	41.04
			19	CDKN2B	ENSG00000147883	9p21.3	Chr9:22002902-22009362	-1	4	6460	41.28
			20	CHRD	ENSG00000090539	3q27.1	Chr3:184097861-184108524	1	19	10663	59.37
			21	CREBBP	ENSG00000005339	16p13.3	Chr16:3775055-3930727	-1	12	155672	45.01
			22	CUL1	ENSG00000055130	7q36.1	Chr7:148395006-148498128	1	3	103122	41.22
			23	DCN	ENSG00000011465	12q21.33	Chr12:91539025-91576900	-1	22	37875	34.59
			24	E2F4	ENSG00000205250	16q22.1	Chr16:67226072-67232821	1	13	6749	56.55
			25	E2F5	ENSG00000133740	8q21.2	Chr8:86089460-86129387	1	9	39927	39.49
			26	EP300	ENSG00000100393	22q13.2	Chr22:41487790-41576081	1	1	88291	42.33
			27	FBN1	ENSG00000166147	15q21.1	Chr15:48700503-48938046	-1	8	237543	38.92
			28	FMOD	ENSG00000122176	1q32.1	Chr1:203309756-203320617	-1	3	10861	50.17
			29	FST	ENSG00000134363	5q11.2	Chr5:52776239-52782964	1	5	6725	45.51
			30	GDF5	ENSG00000125965	20q11.22	Chr20:34021145-34042568	-1	2	21423	48.35
			31	GDF6	ENSG00000156466	8q22.1	Chr8:97154562-97173020	-1	1	18458	51.71
			32	GDF7	ENSG00000143869	2p24.1	Chr2:20866424-20873418	1	1	6994	59.51
			33	GREM1	ENSG00000166923	15q13.3	Chr15:33010175-33026870	1	4	16695	43.51
			34	GREM2	ENSG00000180875	1q43	Chr1:240652873-240775449	-1	1	122576	40.58
			35	HAMP	ENSG00000105697	19q13.12	Chr19:35771619-35776046	1	3	4427	54.11
			36	ID1	ENSG00000125968	20q11.21	Chr20:30193086-30194318	1	2	1232	58.56
			37	ID2	ENSG00000115738	2p25.1	Chr2:8818975-8824583	1	4	5608	49.26
			38	ID3	ENSG00000117318	1p36.12	Chr1:23884409-23886285	-1	3	1876	57.27
			39	ID4	ENSG00000172201	6p22.3	Chr6:19837617-19840915	1	1	3298	53.08
			40	IFNG	ENSG00000111537	12q15	Chr12:68548548-68553527	-1	1	4979	36.04
			41	INHBA	ENSG00000122641	7p14.1	Chr7:41724712-41742706	-1	3	17994	41.68
			42	INHBB	ENSG00000163083	2q14.2	Chr2:121103719-121109384	1	1	5665	56.09
			43	INHBC	ENSG00000175189	12q13.3	Chr12:57828543-57844611	1	1	16068	46.80
			44	INHBE	ENSG00000139269	12q13.3	Chr12:57846106-57853063	1	4	6957	53.48
			45	LEFTY1	ENSG00000243709	1q42.12	Chr1:226073982-226099082	-1	2	25100	50.49
			46	LEFTY2	ENSG00000143768	1q42.12	Chr1:226124298-226129189	-1	3	4891	56.28
			47	LTBP1	ENSG00000049323	2p22.3	Chr2:33172039-33624576	1	15	452537	40.25
			48	MAPK1	ENSG00000100030	22q11.22	Chr22:22108789-22221970	-1	4	113181	43.80
			49	MAPK3	ENSG00000102882	16p11.2	Chr16:30125426-30134827	-1	16	9401	56.36
			50	MYC	ENSG00000136997	8q24.21	Chr8:128747680-128753674	1	5	5994	53.81
			51	NBL1	ENSG00000158747	1p36.13	Chr1:19967048-19984945	1	9	17897	56.98
			52	NEO1	ENSG00000067141	15q24.1	Chr15:73344051-73597547	1	11	253496	38.73
			53	NODAL	ENSG00000156574	10q22.1	Chr10:72192071-72207707	-1	2	15636	51.26
			54	NOG	ENSG00000183691	17q22	Chr17:54671060-54672951	1	1	1891	59.46
			55	PITX2	ENSG00000164093	4q25	Chr4:111538579-111563279	-1	10	24700	49.37
			56	PPP2CA	ENSG00000113575	5q31.1	Chr5:133530025-133561833	-1	6	31808	40.38
			57	PPP2CB	ENSG00000104695	8p12	Chr8:30631973-30671830	-1	10	39857	41.95
			58	PPP2R1A	ENSG00000105568	19q13.41	Chr19:52693292-52730687	1	12	37395	48.26
			59	PPP2R1B	ENSG00000137713	11q23.1	Chr11:111597632-111637151	-1	13	39519	44.57
			60	RBL1	ENSG00000080839	20q11.23	Chr20:35624752-35724398	-1	4	99646	43.07
			61	RBL1	ENSG00000269846	20q11.23	Chr20:35724188-35725581	1	1	1393	55.52
			62	RBX1	ENSG00000100387	22q13.2	Chr22:41347351-41369313	1	3	21962	44.92
			63	RGMA	ENSG00000182175	15q26.1	Chr15:93586636-93632433	-1	14	45797	52.74
			64	RGMB	ENSG00000174136	5q15	Chr5:98104354-98134347	1	7	29993	43.29
			65	RHOA	ENSG00000067560	3p21.31	Chr3:49396578-49450431	-1	6	53853	46.57
			66	ROCK1	ENSG00000067900	18q11.1	Chr18:18526867-18691812	-1	6	164945	36.92
			67	RPS6KB1	ENSG00000108443	17q23.1	Chr17:57970447-58027925	1	12	57478	41.67
			68	RPS6KB2	ENSG00000175634	11q13.2	Chr11:67195931-67202872	1	13	6941	58.79
			69	SKP1	ENSG00000113558	5q31.1	Chr5:133484633-133512729	-1	13	28096	41.25
			70	SMAD1	ENSG00000170365	4q31.21	Chr4:146402346-146479231	1	16	76885	38.45
			71	SMAD2	ENSG00000175387	18q21.1	Chr18:45357922-45457515	-1	12	99593	36.57
			72	SMAD3	ENSG00000166949	15q22.33	Chr15:67356101-67487533	1	15	131432	48.34
			73	SMAD4	ENSG00000141646	18q21.2	Chr18:48494410-48611415	1	17	117005	40.04
			74	SMAD5	ENSG00000113658	5q31.1	Chr5:135468534-135524435	1	13	55901	37.17
			75	SMAD6	ENSG00000137834	15q22.31	Chr15:66994566-67074338	1	6	79772	50.92
			76	SMAD7	ENSG00000101665	18q21.1	Chr18:46446223-46477081	-1	8	30858	52.06
			77	SMAD9	ENSG00000120693	13q13.3	Chr13:37418968-37494902	-1	4	75934	41.07
			78	SMURF1	ENSG00000198742	7q22.1	Chr7:98625061-98741723	-1	4	116662	42.72
			79	SMURF2	ENSG00000108854	17q24.1	Chr17:62538413-62658186	-1	7	119773	39.40
			80	SP1	ENSG00000185591	12q13.13	Chr12:53773960-53810230	1	4	36270	45.65
			81	TFDP1	ENSG00000198176	13q34	Chr13:114239013-114295785	1	9	56772	53.35
			82	TGFB1	ENSG00000105329	19q13.2	Chr19:41807492-41859816	-1	4	52324	53.13
			83	TGFB2	ENSG00000092969	1q41	Chr1:218519577-218617961	1	4	98384	41.85
			84	TGFB3	ENSG00000119699	14q24.3	Chr14:76424442-76449334	-1	7	24892	48.99
			85	TGFBR1	ENSG00000106799	9q22.33	Chr9:101866320-101916474	1	10	50154	39.03
			86	TGFBR2	ENSG00000163513	3p24.1	Chr3:30647994-30735634	1	2	87640	40.81
			87	TGIF1	ENSG00000177426	18p11.31	Chr18:3411606-3458409	1	22	46803	44.07
			88	TGIF2	ENSG00000118707	20q11.23	Chr20:35201891-35222353	1	7	20462	51.95
			89	THBS1	ENSG00000137801	15q14	Chr15:39873280-39891667	1	9	18387	43.51
			90	THSD4	ENSG00000187720	15q23	Chr15:71389291-72075722	1	6	686431	42.50
			91	TNF	ENSG00000232810	6p21.33	Chr6:31543344-31546113	1	1	2769	52.82
			92	ZFYVE16	ENSG00000039319	5q14.1	Chr5:79703832-79775169	1	13	71337	37.65
			93	ZFYVE9	ENSG00000157077	1p32.3	Chr1:52608046-52812358	1	5	204312	40.79
